# Supplementary material
Source: publisher site journal article supplement (https://www.spandidos-publications.com/3044/downloadSupplementary)

Figure S1. Fluorescent staining of astrocytes. (A) Following staining with GFAP, green fluorescence was identified with a fluorescence microscope. Magnification, x200. (B) Following staining with DAPI, blue fluorescence was identified with a fluorescence microscope. Magnification, x200. (C) Cell morphology after fused cells were stained by GFAP or DAPI and the purity of astrocytes was >95%. GFAP, Glial fibrillary acidic protein.

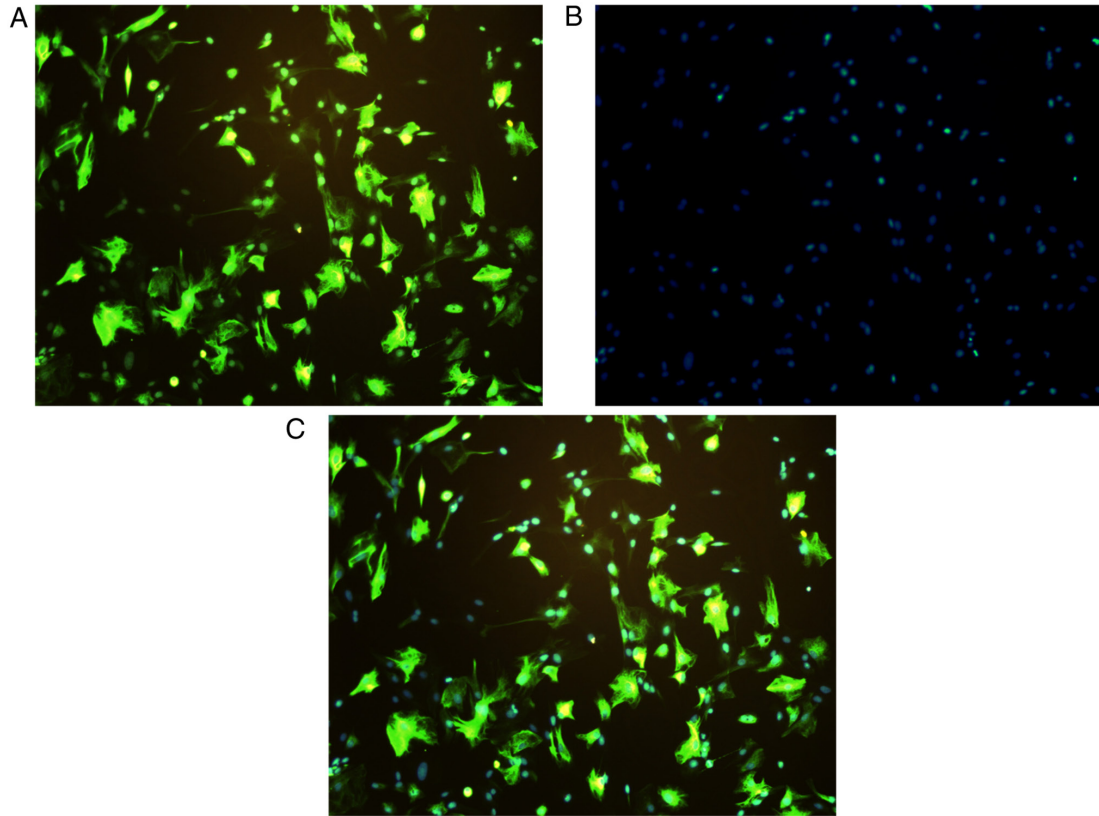

Figure S2. Results of drug concentration screening. (A) Cells treated with 10  $\mu\text{M}$   $\text{A}\beta_{1-42}$  in DMEM/F12 for 24 h as  $\text{A}\beta_{1-42}$ -damage model. (B) The cell vitality treated with the concentration of 20, 40  $\mu\text{M}$  GB in DMEM/F12 for 24 h showed no difference compared with the normal group and the cell activity was significantly improved with 80  $\mu\text{M}$  GB. (C) Concentration of compound C, an effective and reversible AMPK inhibitor, was determined based on the protein expression of AMPK and the preliminary results showed that 10  $\mu\text{M}$  compound C in DMEM/F12 for 24 h inhibited AMPK phosphorylation compared with the normal group. \* $P < 0.05$  and \*\* $P < 0.01$  vs. control group.  $\text{A}\beta$ ,  $\beta$ -amyloid; GB, ginkgolide B; AMPK, 5' adenosine monophosphate-activated protein kinase; p-, phosphorylated.

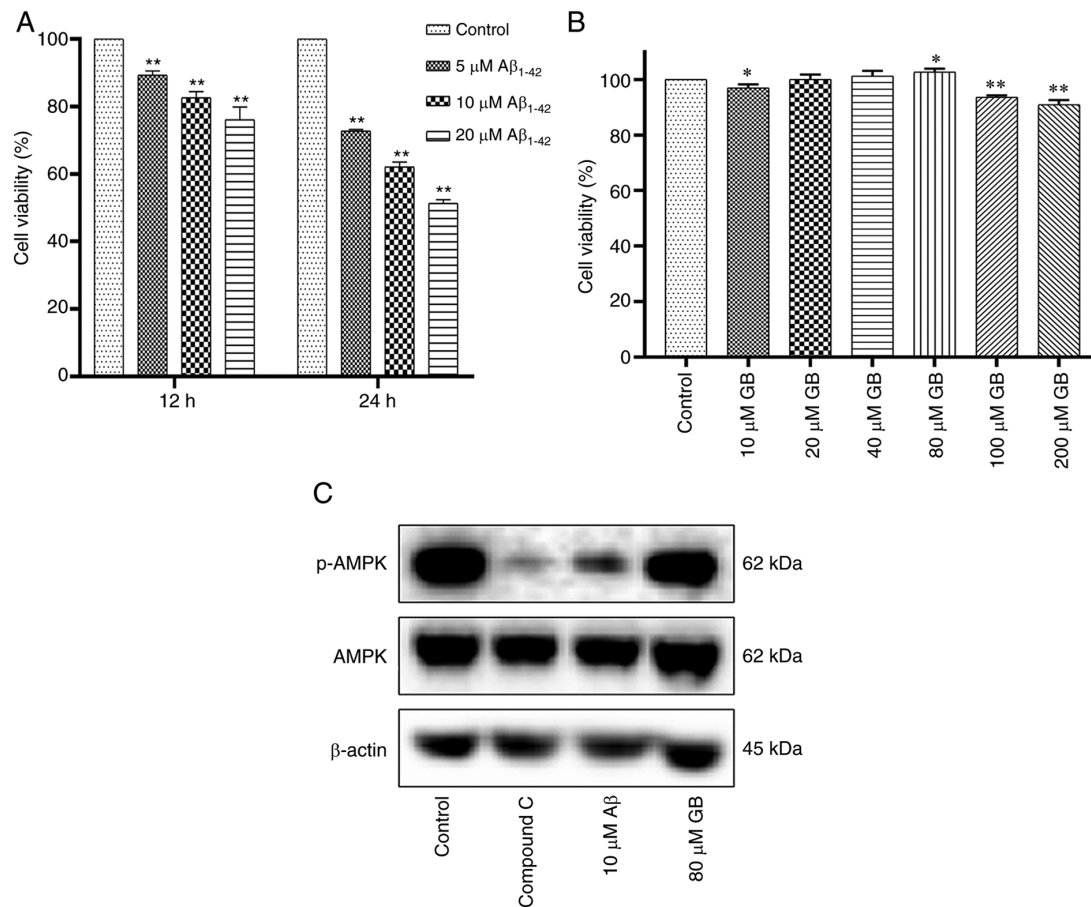

Supplement: Supplementary file 1 [file downloadSupplementary]
